# Supplementary material for: Performance and time to become negative after treatment of three malaria rapid diagnostic tests in low and high malaria transmission settings
Source: PubMed Central journal article supplement (PMC5050565; doi:10.1186/s12936-016-1529-6), 2016-10-04
Supplement: 12936_2016_1529_MOESM1_ESM.pdf [file 12936_2016_1529_MOESM1_ESM.pdf]

## Additional file 1

article “Performance and time to become negative after treatment of three malaria rapid diagnostic tests in low and high malaria transmission settings”

Figure in Additional file 1 - Parasite densities by study site

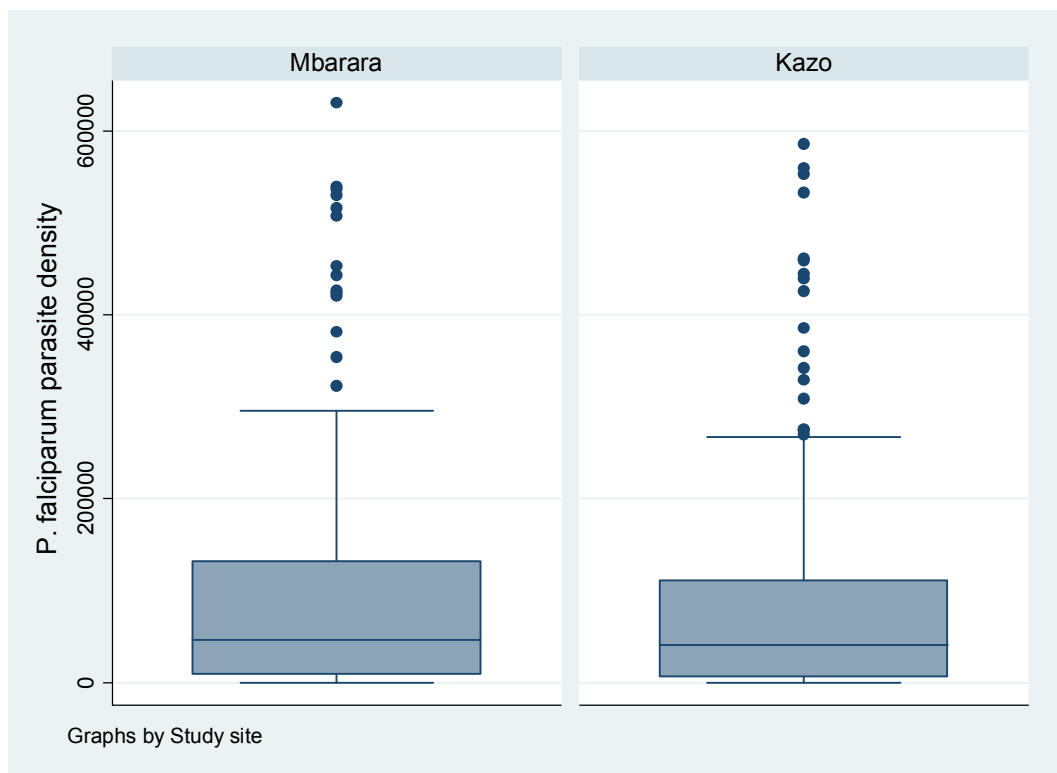

**Table in Additional file 1 - Sensitivity of three RDTs stratified by parasite density and study site**

| Parasite density groups                      | Site    | N   | SD Bioline HRP2 |                    | CareStart HRP2 |                    | CareStart pLDH |                    |
|----------------------------------------------|---------|-----|-----------------|--------------------|----------------|--------------------|----------------|--------------------|
|                                              |         |     | n               | % [95% CI]         | n              | % [95% CI]         | N              | % [95% CI]         |
| Low<br>(1-1,999 parasites/ $\mu$ L)          | Mbarara | 31  | 28              | 90.3 [74.2-98.0]   | 29             | 93.5 [78.6-99.2]   | 23             | 74.2 [55.4-88.1]   |
|                                              | Kazo    | 42  | 41              | 97.6 [87.4-99.9]   | 40             | 95.2 [83.8-99.4]   | 32             | 76.7 [60.5-87.9]   |
| Medium<br>(2,000-199,999 parasites/ $\mu$ L) | Mbarara | 200 | 200             | 100.0 [98.2-100.0] | 200            | 100.0 [98.2-100.0] | 199            | 99.5 [97.2-100]    |
|                                              | Kazo    | 186 | 185             | 99.5 [97.0-100.0]  | 185            | 99.5 [97.0-100.0]  | 182            | 97.8 [94.6-99.4]   |
| High<br>(200,000+ parasites/ $\mu$ L)        | Mbarara | 25  | 24              | 96.0 [79.6-99.9]   | 24             | 96.0 [79.6-99.9]   | 24             | 96.0 [79.6-99.9]   |
|                                              | Kazo    | 34  | 34              | 100.0 [89.7-100.0] | 34             | 100.0 [89.7-100.0] | 34             | 100.0 [89.7-100.0] |
